# Supplementary material for: Learning Multi-Types of Neighbor Node Attributes and Semantics by Heterogeneous Graph Transformer and Multi-View Attention for Drug-Related Side-Effect Prediction
Source: MDPI journal article supplement (doi:10.3390/molecules28186544), 2023-09-09
Supplement: s1 [file s1]

The training and testing time of TCSD and the compared methods was listed in the Supplementary Table ST2.

**Table S2.** The training and testing time of TCSD and the compared methods.

| Running Time                        | TCSD   | GCRS   | idse-HE | SDPred  | Galeaon's<br>Method | RW-<br>SHIN | Ding s<br>Method | FGRMF   |
|-------------------------------------|--------|--------|---------|---------|---------------------|-------------|------------------|---------|
| Average time<br>per<br>epoch/minute | 15     | 17     | 25      | 5       | 9                   | 20          | 23               | 11      |
| Testing time per<br>drug /second    | 0.0027 | 0.0030 | 0.0043  | 0.00086 | 0.0013              | 0.0050      | 0.00282          | 0.00047 |
